# Supplementary material for: Structure, gelation, and antioxidant properties of curcumin-doped casein micelle powder produced by spray-drying
Source: Royal Society of Chemistry journal article supplement (doi:10.1039/c7fo01923h), 2017-12-18
Supplement: c7fo01923h1.pdf [file c7fo01923h1.pdf]

Supplementary Data : Appendix A

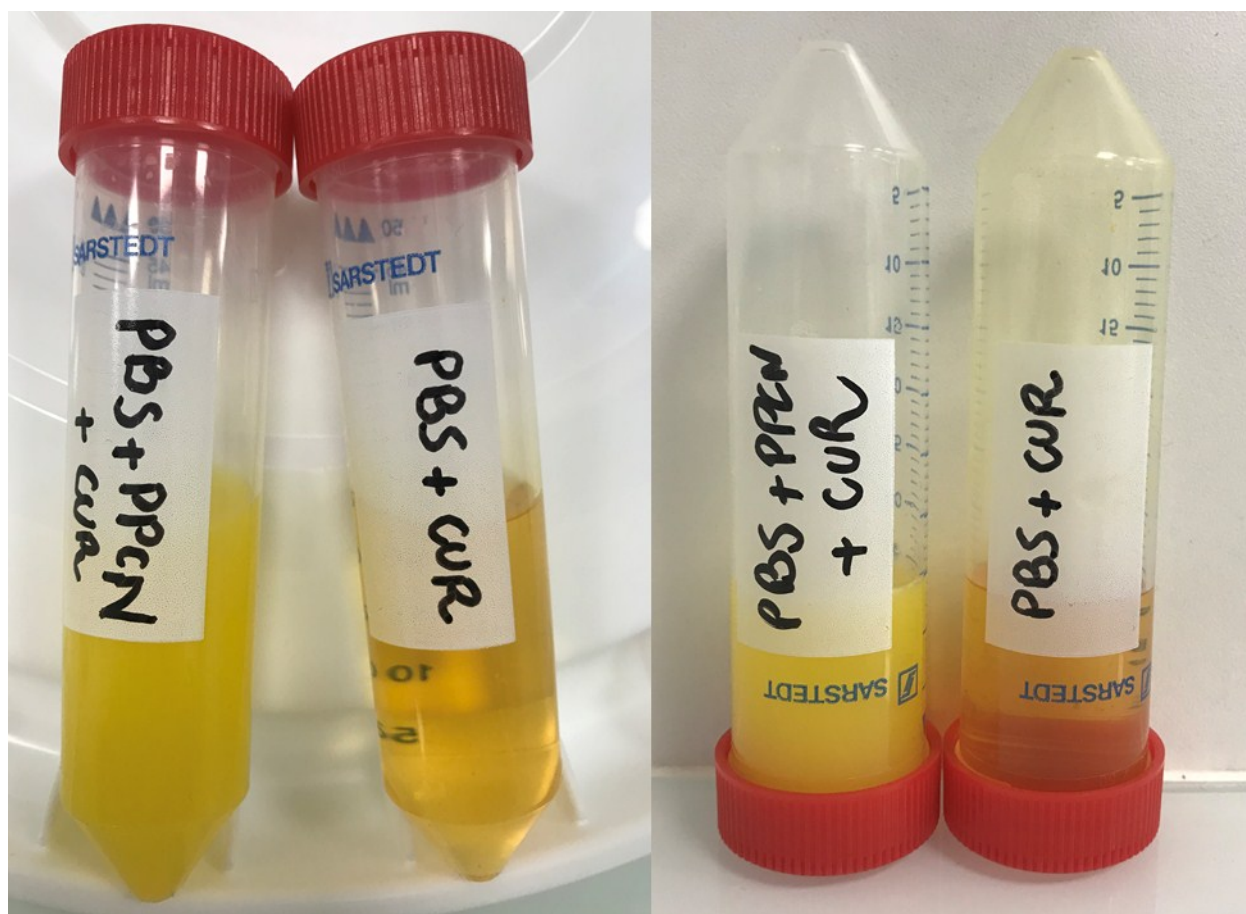

Appendix A : Tubes containing the mix of Micellar casein-Curcumin and Phosphate buffer-curcumin after centrifugation (5000 rpm , 10 min)
